# Supplementary material for: 2015 Middle East Respiratory Syndrome Coronavirus (MERS-CoV) nosocomial outbreak in South Korea: insights from modeling
Source: PeerJ. 2015 Dec 17;3:e1505. doi: 10.7717/peerj.1505 (PMC4690341; doi:10.7717/peerj.1505)
Supplement: Table S1 [file peerj-03-1505-s001.xlsx]

## Sheet: data
n=186
date	onset	cumulate
2015-05-11	1	1
2015-05-12	0	1
2015-05-13	0	1
2015-05-14	0	1
2015-05-15	0	1
2015-05-16	0	1
2015-05-17	0	1
2015-05-18	0	1
2015-05-19	2	3
2015-05-20	6	9
2015-05-21	4	13
2015-05-22	2	15
2015-05-23	4	19
2015-05-24	2	21
2015-05-25	4	25
2015-05-26	2	27
2015-05-27	3	30
2015-05-28	1	31
2015-05-29	3	34
2015-05-30	8	42
2015-05-31	9	51
2015-06-01	20	71
2015-06-02	14	85
2015-06-03	11	96
2015-06-04	12	108
2015-06-05	11	119
2015-06-06	9	128
2015-06-07	6	134
2015-06-08	8	142
2015-06-09	3	145
2015-06-10	9	154
2015-06-11	5	159
2015-06-12	3	162
2015-06-13	3	165
2015-06-14	1	166
2015-06-15	4	170
2015-06-16	6	176
2015-06-17	0	176
2015-06-18	1	177
2015-06-19	0	177
2015-06-20	0	177
2015-06-21	2	179
2015-06-22	2	181
2015-06-23	1	182
2015-06-24	0	182
2015-06-25	0	182
2015-06-26	1	183
2015-06-27	0	183
2015-06-28	0	183
2015-06-29	0	183
2015-06-30	1	184
2015-07-01	0	184
2015-07-02	2	186
2015-07-03	0	186
2015-07-04	0	186
2015-07-05	0	186
2015-07-06	0	186
